# Supplementary material
Source: HighWire-hosted journal article supplement (https://erj.ersjournals.com/content/58/1/2004628)
Supplement: inline-supplementary-material-1 [file inline-supplementary-material-1.pdf]

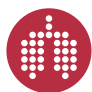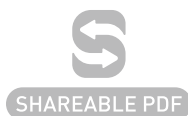

# Human reading *versus* computer-automated reading of chest radiographs in a tuberculosis screening programme in Romania

Gerard de Vries <sup>1,2</sup>, Dan Gainaru<sup>3</sup>, Sytze Keizer<sup>4</sup>, Beatrice Mahler<sup>3</sup>, Ileana Radulescu<sup>3</sup>, Marina Zamfirescu<sup>5</sup> and Ibrahim Abubakar <sup>6</sup>

<sup>1</sup>KNCV Tuberculosis Foundation, The Hague, The Netherlands. <sup>2</sup>National Institute for Public Health and the Environment, Bilthoven, The Netherlands. <sup>3</sup>Marius Nasta Institute of Pneumology, Bucharest, Romania. <sup>4</sup>Castricum, The Netherlands. <sup>5</sup>Audifon Medical Centre, Bucharest, Romania. <sup>6</sup>Institute for Global Health, University College London, London, UK.

Gerard de Vries ([gerard.de.vries@rivm.nl](mailto:gerard.de.vries@rivm.nl))

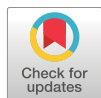

Shareable abstract (@ERSpublications)

**Automated reading of chest radiographs in a tuberculosis screening programme can reduce human reading to less than 20% of the chest radiographs, avoiding unnecessary TB examinations while maintaining high sensitivity** <https://bit.ly/3kCFWmq>

**Cite this article as:** de Vries G, Gainaru D, Keizer S, *et al.* Human reading *versus* computer-automated reading of chest radiographs in a tuberculosis screening programme in Romania. *Eur Respir J* 2021; 58: 2004628 [DOI: 10.1183/13993003.04628-2020].

This single-page version can be shared freely online.

Copyright ©The authors 2021. For reproduction rights and permissions contact [permissions@ersnet.org](mailto:permissions@ersnet.org)

Received: 24 Dec 2020  
Accepted: 24 Feb 2021

## To the Editor:

One of the interventions in tuberculosis (TB) control is to screen people at high risk for TB with chest radiography [1]. Chest radiography in TB screening programmes are usually read by a radiographer or a pulmonologist specialised in TB. In recent years, computer-aided detection (CAD) software has become available for automated reading of CXRs and identifying people with presumptive TB [2, 3] and for TB screening [4, 5]. A systematic review published in 2016 concluded that the evidence of diagnostic accuracy of CAD was limited by the small number of studies, co-authored by owners of the only CAD software on the market at that time, and not generalisable to low TB and HIV settings [6]. The application of CAD software for TB detection has to our knowledge not been assessed in Europe.

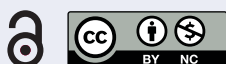

Copyright ©The authors 2021. For reproduction rights and permissions contact [permissions@ersnet.org](mailto:permissions@ersnet.org)
